# Supplementary material for: Electrically Conductive and Antimicrobial Agro-Food Waste Biochar Functionalized with Zinc Oxide Particles
Source: MDPI journal article supplement (doi:10.3390/ijms23148022), 2022-07-21
Supplement: s1 [file s1]

## Supplementary Information

### Electrically conductive and antimicrobial agro-food waste biochar functionalized with zinc oxide particles

Zélia Alves<sup>1,2</sup>, Nuno M. Ferreira<sup>3</sup>, Gonçalo Figueiredo<sup>4</sup>, Sónia Mendo<sup>4</sup>, Cláudia Nunes<sup>1,\*</sup>,  
Paula Ferreira<sup>1,\*</sup>

<sup>1</sup> CICECO – Aveiro Institute of Materials, Department of Materials and Ceramic Engineering, University of Aveiro, 3810-193 Aveiro, Portugal

<sup>2</sup> CICECO – Aveiro Institute of Materials, Department of Chemistry, University of Aveiro, 3810-193 Aveiro, Portugal

<sup>3</sup> i3N, Department of Physics, University of Aveiro, 3810-193 Aveiro, Portugal

<sup>4</sup> CESAM, Department of Biology, University of Aveiro, 3810-193 Aveiro, Portugal

*\*Corresponding authors:*

*Cláudia Nunes, claudianunes@ua.pt*

*Paula Ferreira, pcferreira@ua.pt;*

## 1. Results and Discussion

### 1.1. Characterization of biochars

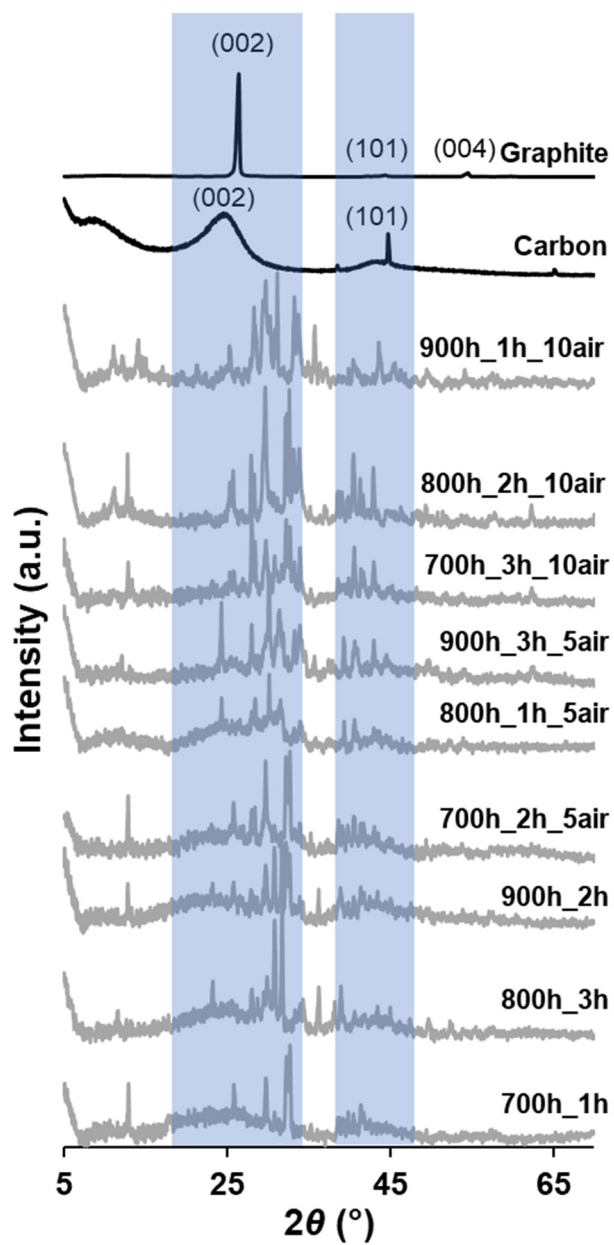

Figure S1 – XRD diffractograms of biochars resultant of kidney bean pods pyrolysis using different time, temperature, and air oxidation conditions. Diffractograms of carbon and graphite are displayed as a reference.

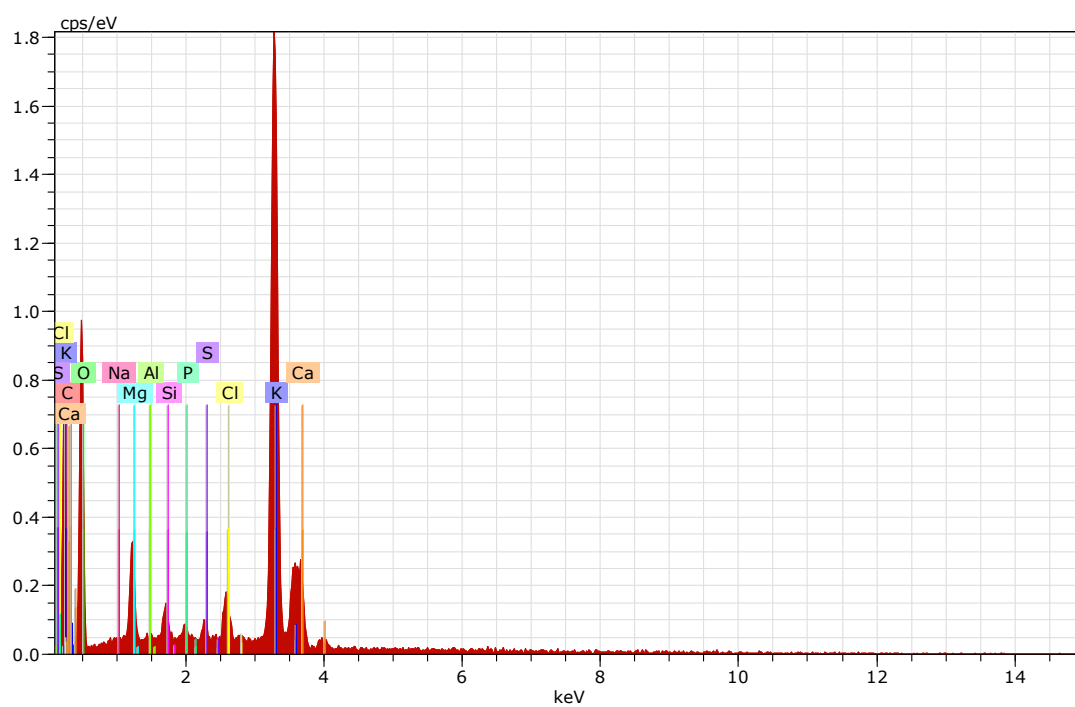

Figure S2 – EDS analysis of 800C\_2h\_10air biochar sample.

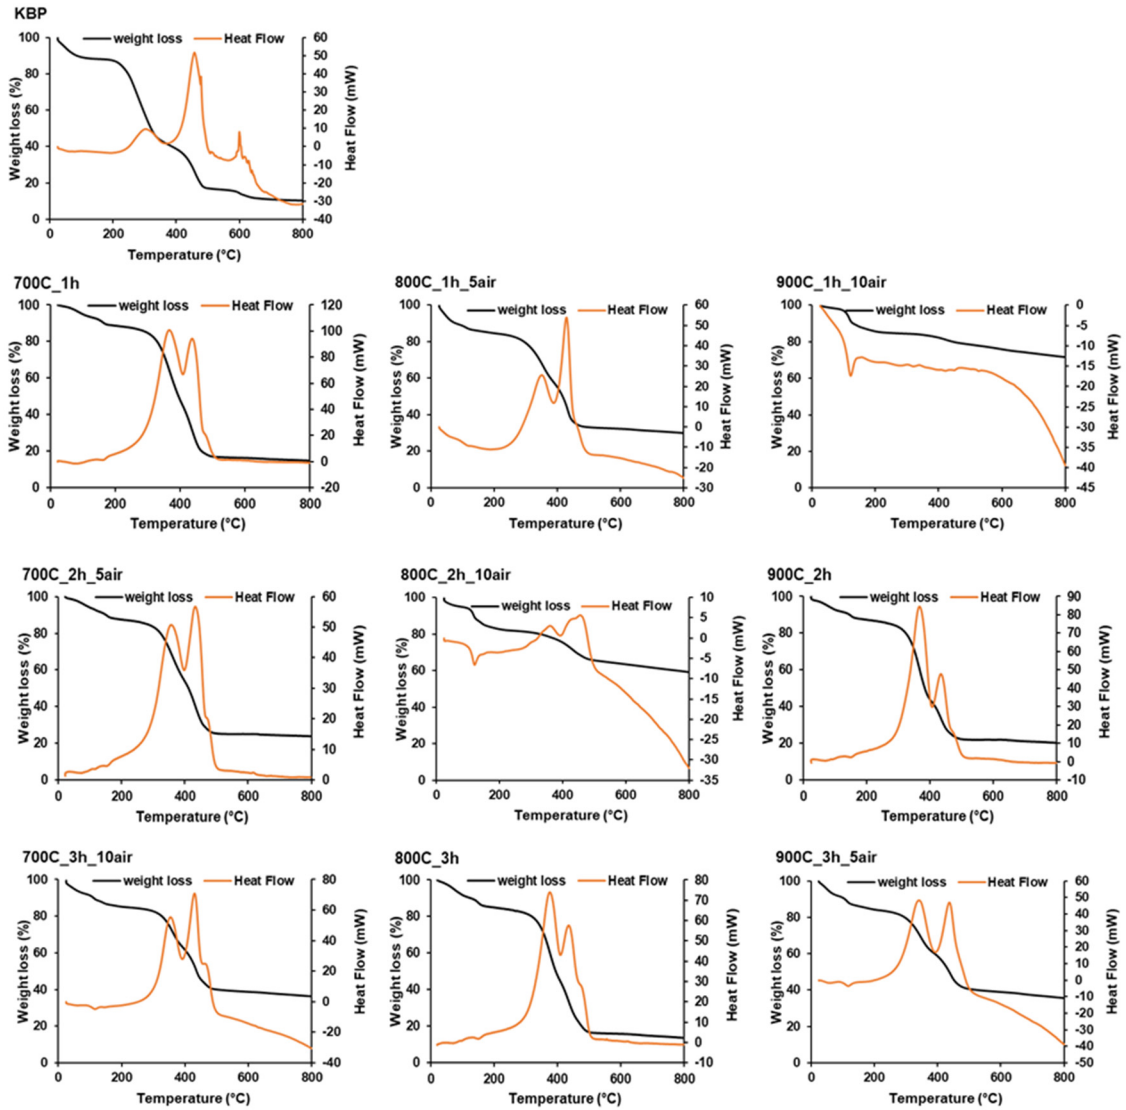

Figure S3 – TGA-DSC analysis of biomass (KBP) and biochars resulted from different pyrolysis conditions.

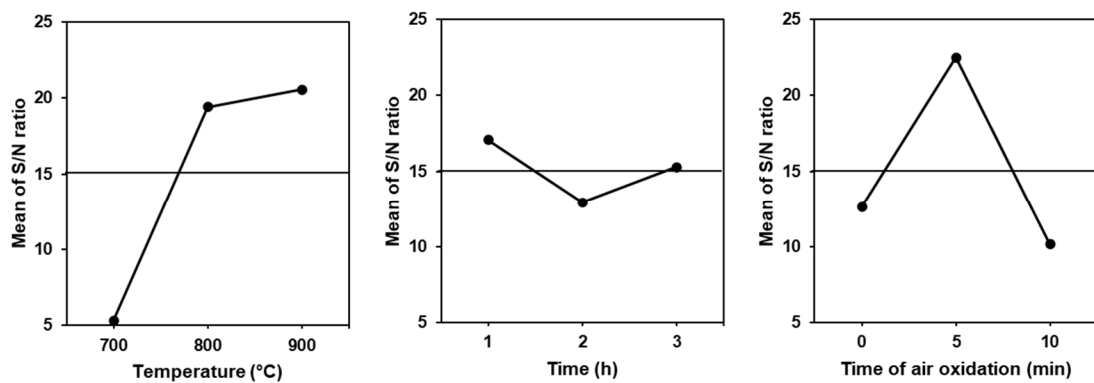

Figure S4 – S/N ratio graph (larger is better) of the control factors on the  $S_{BET}$  response.

Table S1 – Response Table for Signal to Noise Ratios - Larger is better

| Level | Temperature | Time   | Time of air oxidation |
|-------|-------------|--------|-----------------------|
| 1     | 5.318       | 17.069 | 12.632                |
| 2     | 19.411      | 12.94  | 22.492                |
| 3     | 20.557      | 15.278 | 10.162                |
| Delta | 15.239      | 4.129  | 12.33                 |
| Rank  | 1           | 3      | 2                     |

Table S2 – Analysis of Variance for S/N ratios related with  $S_{BET}$ .

| Source                | DF | Seq SS | Adj SS | Adj MS | F    | P     | Contribution (%) |
|-----------------------|----|--------|--------|--------|------|-------|------------------|
| Temperature           | 2  | 432.15 | 432.15 | 216.07 | 2.52 | 0.284 | 48.85            |
| Time                  | 2  | 25.72  | 25.72  | 12.86  | 0.15 | 0.87  | 2.91             |
| Time of air oxidation | 2  | 255.36 | 255.36 | 127.68 | 1.49 | 0.402 | 28.86            |
| Residual Error        | 2  | 171.46 | 171.46 | 85.73  |      |       | 19.38            |
| Total                 | 8  | 884.69 |        |        |      |       |                  |

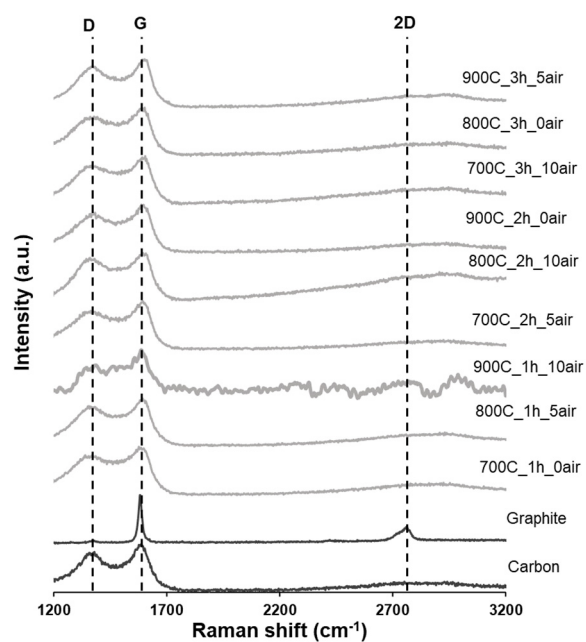

Figure S5 – Raman spectra of biochars resulted from pyrolysis of kidney bean pods in different conditions. The spectra of carbon and graphite are displayed as a reference.

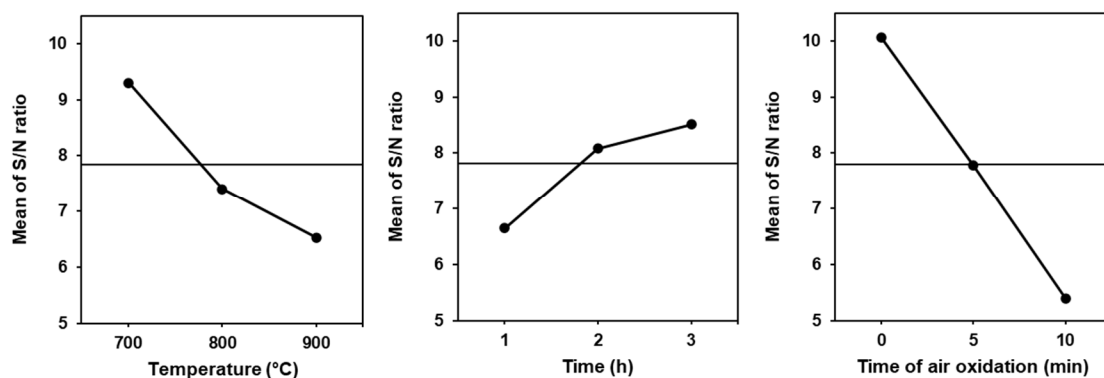

Figure S6 – S/N ratio graph (larger is better) of the control factors on the  $I_D/I_G$  response.

Table S3 – Response Table for Signal to Noise Ratios - Larger is better of the control factors on the  $I_D/I_G$  response.

| Level | Temperature | Time  | Time of air oxidation |
|-------|-------------|-------|-----------------------|
| 1     | 9.304       | 6.648 | 10.069                |
| 2     | 7.406       | 8.082 | 7.776                 |
| 3     | 6.532       | 8.512 | 5.398                 |
| Delta | 2.772       | 1.865 | 4.671                 |
| Rank  | 2           | 3     | 1                     |

Table S4 – Analysis of Variance for S/N ratios related with  $I_D/I_G$  response.

| Source                | DF | Seq SS | Adj SS | Adj MS | F    | P     | contribution (%) |
|-----------------------|----|--------|--------|--------|------|-------|------------------|
| Temperature           | 2  | 12.051 | 12.051 | 6.026  | 2.14 | 0.319 | 21.47            |
| Time                  | 2  | 5.72   | 5.72   | 2.86   | 1.01 | 0.497 | 10.19            |
| Time of air oxidation | 2  | 32.726 | 32.726 | 16.363 | 5.8  | 0.147 | 58.29            |
| Residual Error        | 2  | 5.644  | 5.644  | 2.822  |      |       | 10.05            |
| Total                 | 8  | 56.142 |        |        |      |       |                  |

Table S5 – Raman data (FWHM) relative to D and G band of biochars, and carbon and graphite used as a reference.

|               | FWHM (cm <sup>-1</sup> ) |          |
|---------------|--------------------------|----------|
|               | D                        | G        |
| 700C_1h_0air  | 307.265                  | 105.1851 |
| 800C_1h_5air  | 263.7241                 | 109.0252 |
| 900C_1h_10air | 187.38                   | 113.5524 |
| 700C_2h_5air  | 323.429                  | 93.29312 |
| 800C_2h_10air | 217.7947                 | 119.4004 |
| 900C_2h_0air  | 305.8885                 | 94.81156 |
| 700C_3h_10air | 277.4096                 | 102.6228 |
| 800C_3h_0air  | 296.4806                 | 99.08171 |
| 900C_3h_5air  | 245.9497                 | 103.1201 |
| Graphite      | 28.53378                 | 22.3247  |
| Carbon        | 248.3008                 | 101.9279 |

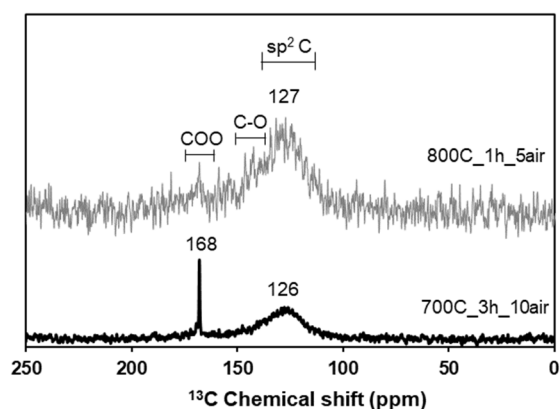

Figure S7 –  $^{13}\text{C}$  CP-MAS NMR spectra of 800C\_1h\_5air and 700C\_3h\_10air biochar samples.

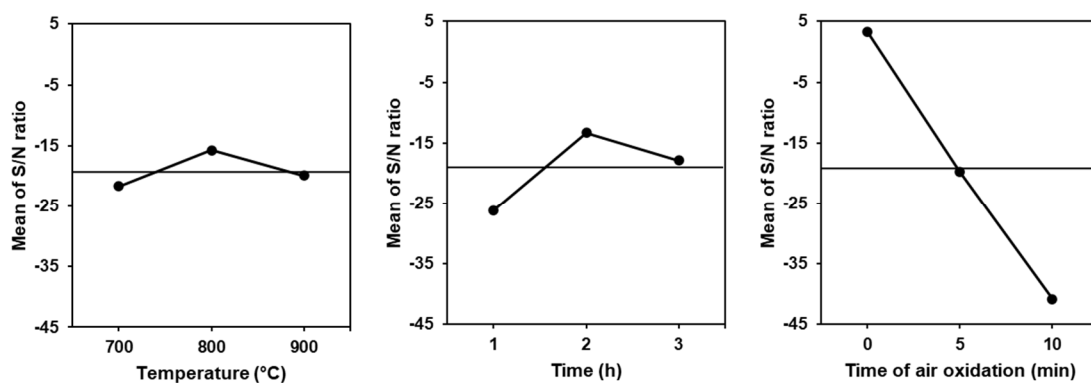

Figure S8 – S/N ratio graph (larger is better) of the control factors on the electrical conductivity response.

Table S6 – Response Table for Signal to Noise Ratios - Larger is better of the control factors on the electrical conductivity response.

| Level | Temperature | Time    | Time of air oxidation |
|-------|-------------|---------|-----------------------|
| 1     | -21.666     | -26.133 | 3.292                 |
| 2     | -15.726     | -13.325 | -19.762               |
| 3     | -19.891     | -17.825 | -40.813               |
| Delta | 5.939       | 12.809  | 44.105                |
| Rank  | 3           | 2       | 1                     |

Table S7 – Analysis of Variance for S/N ratios related with electrical conductivity response.

| Source                | DF | Seq SS  | Adj SS  | Adj MS  | F     | P     | Contribution (%) |
|-----------------------|----|---------|---------|---------|-------|-------|------------------|
| Temperature           | 2  | 55.77   | 55.77   | 27.89   | 0.44  | 0.695 | 1.66%            |
| Time                  | 2  | 253.34  | 253.34  | 126.67  | 2     | 0.334 | 7.55%            |
| Time of air oxidation | 2  | 2919.83 | 2919.83 | 1459.92 | 23.01 | 0.042 | 87.01%           |
| Residual Error        | 2  | 126.91  | 126.91  | 63.45   |       |       | 3.78%            |
| Total                 | 8  | 3355.85 |         |         |       |       |                  |

## 1.2. Characterization of ZnO-C composites

Table S8 – FWHM of (101) plane, lattice parameters and  $S_{\text{BET}}$  present in the XRD diffractograms of pristine ZnO and ZnO- $\text{C}_{\text{SBET}}$ , ZnO- $\text{C}_{\text{EC}}$ , and ZnO-rGO composites.

|                                                | (101) FWHM<br>(°) | Lattice parameters (Å) |       | $S_{\text{BET}}$<br>(m <sup>2</sup> /g) |
|------------------------------------------------|-------------------|------------------------|-------|-----------------------------------------|
|                                                |                   | $a=b$                  | $c$   |                                         |
| <b>ZnO</b>                                     | 0.22583           | 3.243                  | 5.193 | 7                                       |
| <b>ZnO-<math>\text{C}_{\text{SBET}}</math></b> | 0.23767           | 3.246                  | 5.200 | 85                                      |
| <b>ZnO-<math>\text{C}_{\text{EC}}</math></b>   | 0.256657          | 3.243                  | 5.196 | 15                                      |
| <b>ZnO-rGO</b>                                 | 0.25299           | 3.243                  | 5.193 | 15                                      |

Table S9 – Raman data of pristine ZnO and ZnO- $\text{C}_{\text{SBET}}$ , ZnO- $\text{C}_{\text{EC}}$ , and ZnO-rGO composites samples related with the modes of ZnO and rGO.

|                                                | $E_2^{\text{H}}$<br>FWHM | $E_2^{\text{H}}/A_1^{\text{LO}}$ | FWHM |     | $I_{\text{D}}/I_{\text{G}}$ |
|------------------------------------------------|--------------------------|----------------------------------|------|-----|-----------------------------|
|                                                |                          |                                  | D    | G   |                             |
| <b>ZnO</b>                                     | 15.322                   | 2.174                            | -    | -   | -                           |
| <b>ZnO-<math>\text{C}_{\text{SBET}}</math></b> | 16.974                   | 0.140                            | 214  | 103 | 1.36                        |
| <b>ZnO-<math>\text{C}_{\text{EC}}</math></b>   | 18.297                   | 0.168                            | 134  | 103 | 0.78                        |
| <b>ZnO-rGO</b>                                 | 23.027                   | 0.525                            | 165  | 88  | 1.36                        |

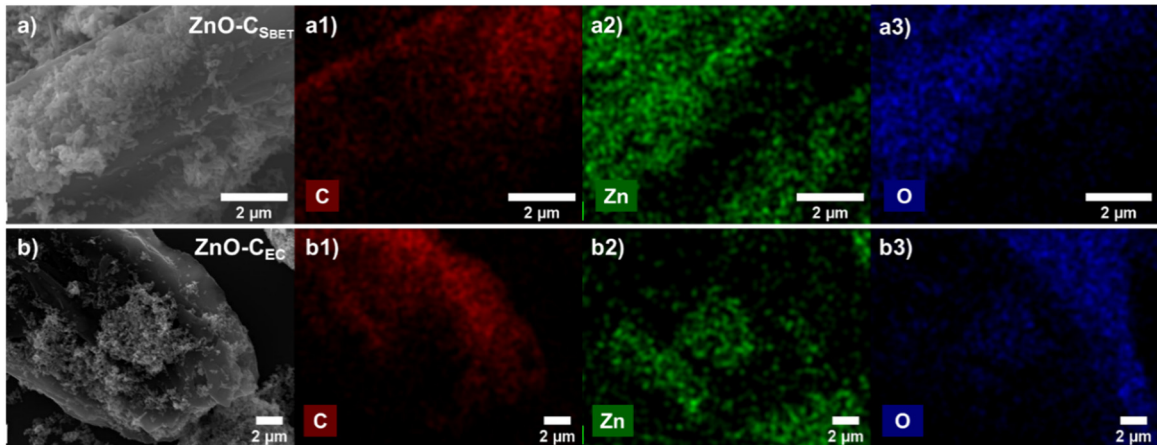

Figure S9 – SEM images of (a) ZnO- $\text{C}_{\text{SBET}}$  and (b) ZnO- $\text{C}_{\text{EC}}$  composites and corresponding EDS elemental maps of C, Zn, and O elements.

Table S10 – X-ray fluorescence spectroscopy data of pristine ZnO and zinc oxide composites, namely ZnO- $C_{SBET}$ , ZnO- $C_{EC}$ , and ZnO-rGO.

|                                    | Samples |                 |               |         |
|------------------------------------|---------|-----------------|---------------|---------|
|                                    | ZnO     | ZnO- $C_{SBET}$ | ZnO- $C_{EC}$ | ZnO-rGO |
| Na <sub>2</sub> O (%)              | -       | -               | -             | 0.55    |
| MgO (%)                            | -       | 0.42            | 1.00          | 0.29    |
| Al <sub>2</sub> O <sub>3</sub> (%) | 0.05    | -               | 0.11          | -       |
| SiO <sub>2</sub> (%)               | 0.35    | 0.69            | 1.25          | 0.42    |
| P <sub>2</sub> O <sub>5</sub> (%)  | 2.98    | 5.70            | 6.99          | 2.34    |
| SO <sub>3</sub> (%)                | -       | 0.18            | 0.51          | 0.14    |
| Cl (%)                             | -       | 0.3             | 0.59          | 0.20    |
| K <sub>2</sub> O (%)               | -       | 0.1             | 0.14          | 0.07    |
| CaO (%)                            | 1.13    | 5.23            | 6.36          | 1.63    |
| TiO <sub>2</sub> (%)               | -       | -               | 0.36          | -       |
| Fe <sub>2</sub> O <sub>3</sub> (%) | 0.14    | 0.33            | 0.45          | 0.08    |
| NiO (%)                            | 0.03    | 0.05            | 0.10          | 0.04    |
| CuO (%)                            | -       | -               | 0.09          | 0.03    |
| SrO (%)                            | -       | 0.12            | -             | -       |
| PdO (%)                            | -       | 0.49            | -             | -       |
| ZnO (%)                            | 95.34   | 86.39           | 82.07         | 94.21   |

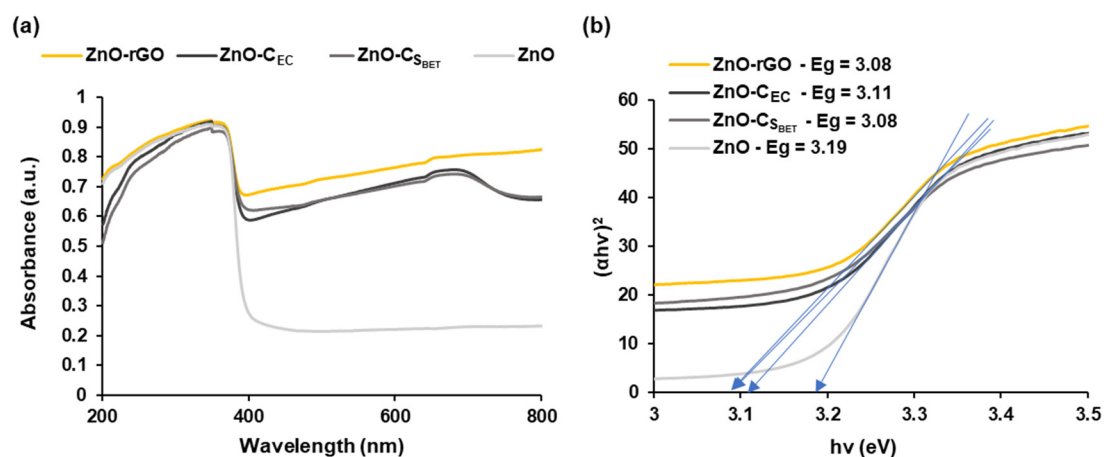

Figure S10 – (a) UV-vis diffuse reflectance (DRS) and (b) Tauc plots of ZnO, ZnO- $C_{SBET}$ , ZnO- $C_{EC}$ , and ZnO-rGO composites samples.

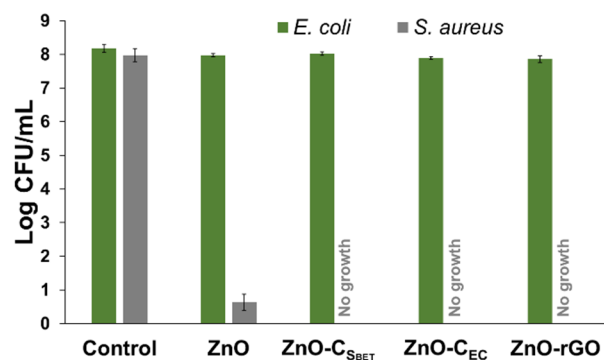

Figure S11 – Antibacterial activity against *E. coli* ATCC25922 and *S. aureus* ATCC29213 of pristine ZnO and the zinc oxide composites, namely ZnO- $C_{SBET}$ , ZnO- $C_{EC}$ , and ZnO-rGO. The control consisted only of each bacterial strain growing in the absence of any composites (Control).
